# Supplementary material for: The effects of organic solvents on the folding pathway and associated thermodynamics of proteins: a microscopic view
Source: PubMed Central journal article supplement (PMC4726029; doi:10.1038/srep19500), 2016-01-18
Supplement: srep19500-s1.pdf [file srep19500-s1.pdf]

## Supplementary information

# The effects of organic solvents on the folding pathway and associated thermodynamics of proteins: a microscopic view

Yuqi Yu<sup>1</sup>, Jinan Wang<sup>1</sup>, Qiang Shao<sup>1\*</sup>, Jiye Shi<sup>2\*</sup>, Weiliang Zhu<sup>1\*</sup>

Drug Discovery and Design Center, Shanghai Institute of Materia Medica, Chinese Academy of  
Sciences, 555 Zuchongzhi Road, Shanghai, 201203, China

<sup>1</sup>Drug Discovery and Design Center, CAS Key Laboratory of Receptor Research, Shanghai Institute  
of Materia Medica, Chinese Academy of Sciences, 555 Zuchongzhi Road, Shanghai, 201203, China

<sup>2</sup>UCB Biopharma SPRL, Chemin du Foriest, Braine-l'Alleud, Belgium

\*To whom correspondence should be addressed. Qiang Shao, Tel: +86 21 50806600-1304, E-mail:  
[qshao@mail.shcnc.ac.cn](mailto:qshao@mail.shcnc.ac.cn); Jiye Shi, [Jiye.Shi@ucb.com](mailto:Jiye.Shi@ucb.com); Weiliang Zhu, [wzhu@mail.shcnc.ac.cn](mailto:wzhu@mail.shcnc.ac.cn)

Table S1. Simulation parameters.

| Simulation System         | Force Field | $N_{\text{water}}$ | $N_{\text{MeOH}}$<br>( $N_{\text{EMIM-Cl}}$ ) | Replicas of REMD | Time per Replica (ns) | Box size ( $\text{\AA}^3$ ) |
|---------------------------|-------------|--------------------|-----------------------------------------------|------------------|-----------------------|-----------------------------|
| GB1p in water             | FF99SBildn  | 1979               | -                                             | 38               | 80                    | 44.2×36.4×38.6              |
|                           | FF96        | 1979               | -                                             | 38               | 80                    | 44.2×36.4×38.6              |
| GB1p in MeOH/water        | FF99SBildn  | 1200               | 250                                           | 38               | 52                    | 37.7×38.4×38.6              |
| GB1p in EMIM-Cl/water     | FF99SBildn  | 1269               | 100                                           | 38               | 116                   | 40.7×37.4×41.5              |
| Trp-cage in water         | FF99SBildn  | 2061               | -                                             | 40               | 116                   | 40.1×40.5×40.3              |
|                           | FF94        | 2687               | -                                             | 40               | 100                   | 42.8×45.6×39.4              |
| Trp-cage in MeOH/water    | FF99SBildn  | 1199               | 250                                           | 38               | 150                   | 37.5×38.2×38.4              |
| Trp-cage in EMIM-Cl/water | FF99SBildn  | 1193               | 100                                           | 38               | 98                    | 39.5×40.0×39.0              |

Table S2. Temperature distribution in REMD simulation systems under study.

| Simulation System               | Temperature Range (K) |        |        |        |        |        |
|---------------------------------|-----------------------|--------|--------|--------|--------|--------|
| GB1p in water                   | 300.10                | 304.95 | 309.99 | 315.05 | 320.32 | 325.61 |
|                                 | 331.00                | 336.00 | 342.00 | 347.45 | 353.65 | 359.30 |
|                                 | 365.30                | 371.33 | 377.00 | 383.80 | 389.90 | 396.34 |
|                                 | 402.50                | 409.00 | 416.31 | 423.18 | 430.17 | 437.25 |
|                                 | 444.50                | 451.90 | 459.20 | 467.30 | 474.30 | 482.48 |
|                                 | 489.80                | 498.51 | 506.70 | 515.10 | 523.62 | 532.25 |
| Trp-cage in MeOH/water          | 541.00                | 550.00 |        |        |        |        |
|                                 | 300.00                | 304.00 | 309.00 | 314.00 | 319.15 | 324.20 |
|                                 | 329.32                | 334.48 | 339.72 | 345.04 | 350.44 | 355.93 |
|                                 | 361.51                | 367.17 | 372.92 | 378.76 | 384.70 | 390.72 |
|                                 | 396.84                | 403.06 | 409.37 | 415.70 | 422.30 | 428.98 |
|                                 | 435.50                | 442.20 | 449.18 | 456.25 | 463.30 | 470.70 |
| Trp-cage in water (FF99SB-ILDN) | 477.95                | 485.20 | 493.00 | 500.25 | 508.08 | 516.10 |
|                                 | 524.30                | 532.70 | 541.25 | 550.00 |        |        |
|                                 | 280.00                | 284.10 | 288.20 | 292.40 | 296.70 | 301.10 |
|                                 | 305.60                | 310.20 | 314.90 | 319.70 | 324.60 | 329.60 |
|                                 | 334.70                | 340.00 | 345.40 | 351.00 | 356.60 | 362.50 |
|                                 | 368.40                | 374.60 | 380.90 | 387.30 | 394.00 | 400.80 |
| Trp-cage in water (FF94)        | 407.80                | 415.10 | 422.50 | 430.10 | 438.00 | 446.00 |
|                                 | 454.30                | 462.80 | 471.60 | 480.60 | 489.80 | 499.30 |
|                                 | 509.00                | 519.00 | 529.20 | 539.70 |        |        |
|                                 |                       |        |        |        |        |        |

Table S3. Intra-protein backbone hydrogen bonds in the folded and misfolded states of GB1p in water simulated by FF96 force field.

| HBs | F            | M1           | M2           | M3           | M4           |
|-----|--------------|--------------|--------------|--------------|--------------|
| HB1 | Thr15O-Glu2H | Glu16O-Gly1H | Thr15O-Gly1H | Thr15O-Thr4H | Thr15O-Gly1H |
| HB2 | Glu2O-Thr15H | Gly1O-Glu16H | Gly1O-Thr15H | Thr4O-Thr15H | Thr15O-Glu2H |
| HB3 | Thr13O-Thr4H | Val14O-Trp3H | Thr13O-Trp3H | Thr13O-Asp6H | Glu2O-Thr15H |
| HB4 | Thr4O-Thr13H | Trp3O-Val14H | Trp3O-Thr13H | Thr13O-Asp7H | Glu2O-Val14H |
| HB5 | Thr11O-Asp6H | Phe12O-Tyr5H | Thr11O-Tyr5H | Asp7O-Thr13H | Phe12O-Thr4H |
| HB6 | Asp6O-Thr11H | Tyr5O-Phe12H | -            | -            | Thr4O-Thr11H |
| HB7 | -            | -            | -            | -            | Thr9O-Asp6H  |

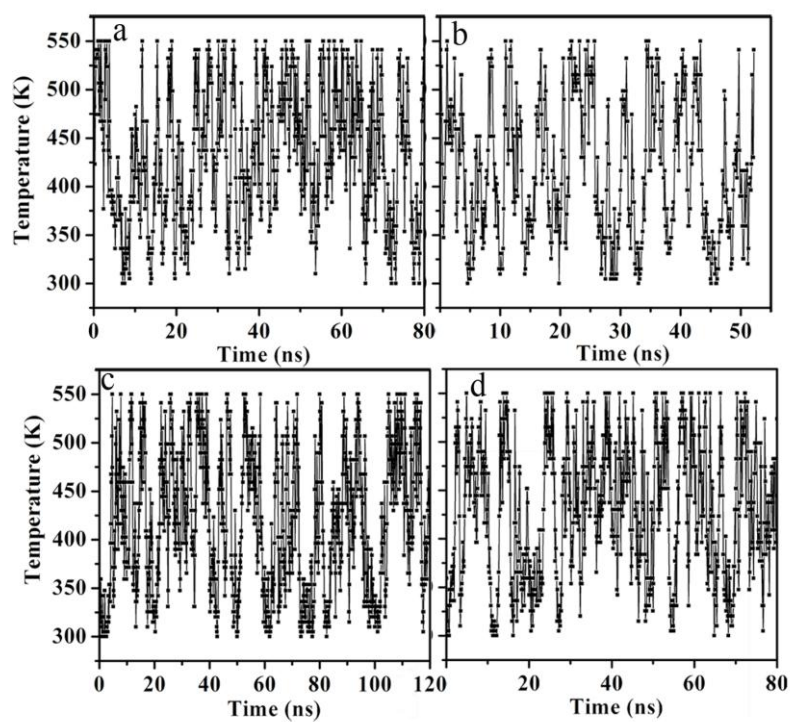

Figure S1. Temperature histories of representative replicas in the REMD simulations of (a-c) GB1p in water, MeOH/water, and EMIM-Cl/water solutions under FF99SB-ILDN force field, and (d) GB1p in water under FF96 force field. For clarity, we sampled the data every 100 exchanges.

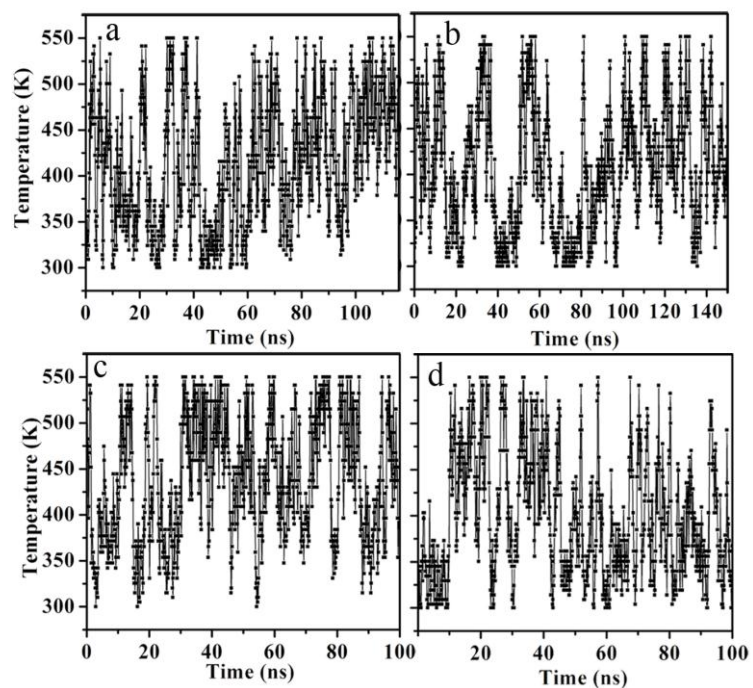

Figure S2. Temperature histories of representative replicas in the REMD simulations of (a-c) Trp-cage in water, MeOH/water, and EMIM-Cl/water solutions under FF99SB-ILDN force field, and (d) Trp-cage in water under FF94 force field. For clarity, we sampled the data every 100 exchanges.

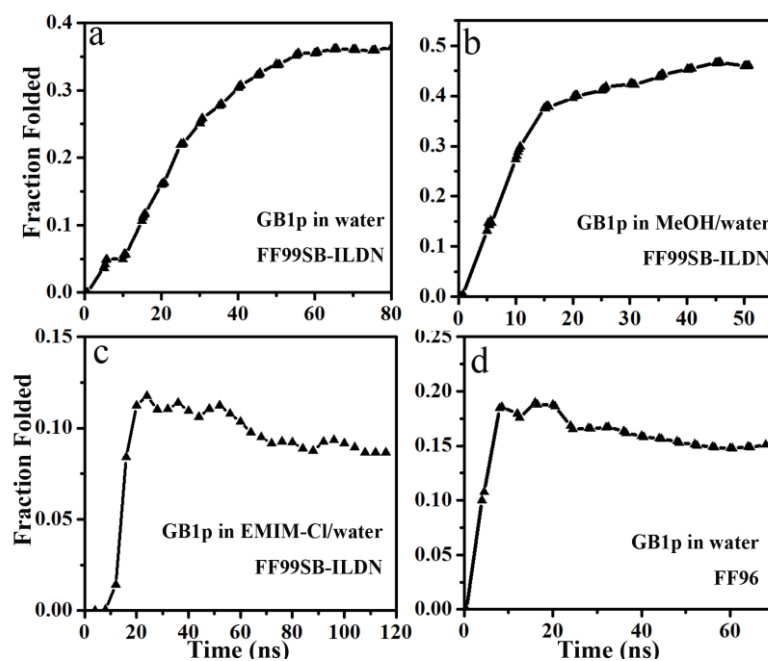

Figure S3. Time series of the fraction of folded state of GB1p at 300 K in (a) water under FF99SB-ILDN force field, (b) MeOH/water under FF99SB-ILDN force field, (c) EMIM-Cl/water under FF99SB-ILDN force field, and (d) water under FF96 force field, respectively.

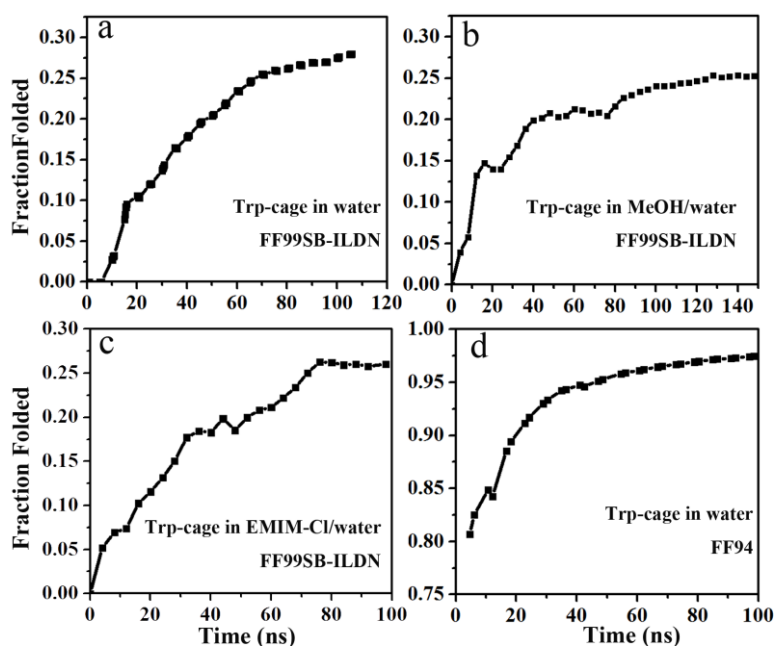

Figure S4. Time series of the fraction of folded state of Trp-cage at 300 K in (a) water under FF99SB-ILDN force field, (b) MeOH/water under FF99SB-ILDN force field, (c) EMIM-Cl/water under FF99SB-ILDN force field, and (d) water under FF94 force field, respectively.



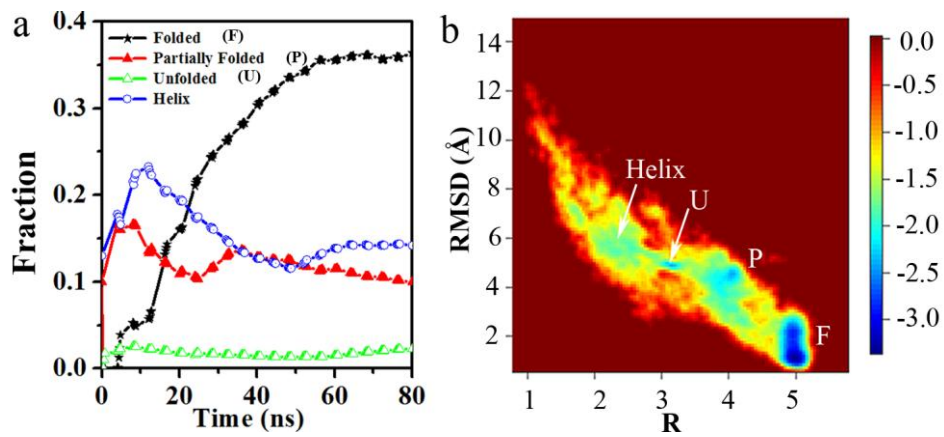

Figure S5. (a) Time series of the fraction of all distinct states in the folding pathway of GB1p in water and at 300 K as simulated by FF99SB-ILDN force field. (b) Coordinate diagram for all states (folded, partially folded, unfolded, helix states) of GB1p in two-dimensional free energy landscape at 300 K.

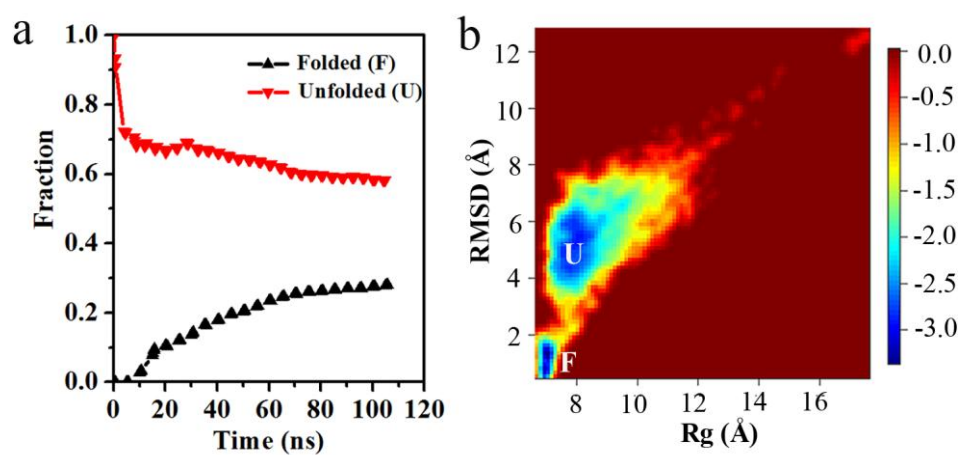

Figure S6. (a) Time series of the fraction of all distinct states in the folding pathway of Trp-cage in water and at 300 K as simulated by FF99SB-ILDN force field. (b) Coordinate diagram for all states (folded and unfolded states) of Trp-cage in two-dimensional free energy landscape at 300 K.

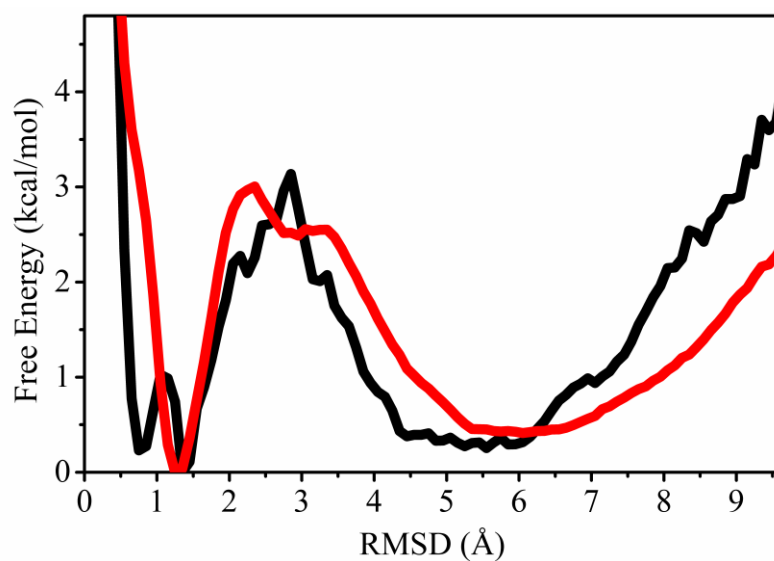

Figure S7. Comparison of one-dimensional free energy profiles as the function of backbone RMSD for GB1p in water simulated in the present REMD simulation using FF99SB-ILDN force field (black line) and in the conventional MD simulation using CHARMM22\* force field by Lindorff-Larsen *et al.*<sup>34</sup> (red line).

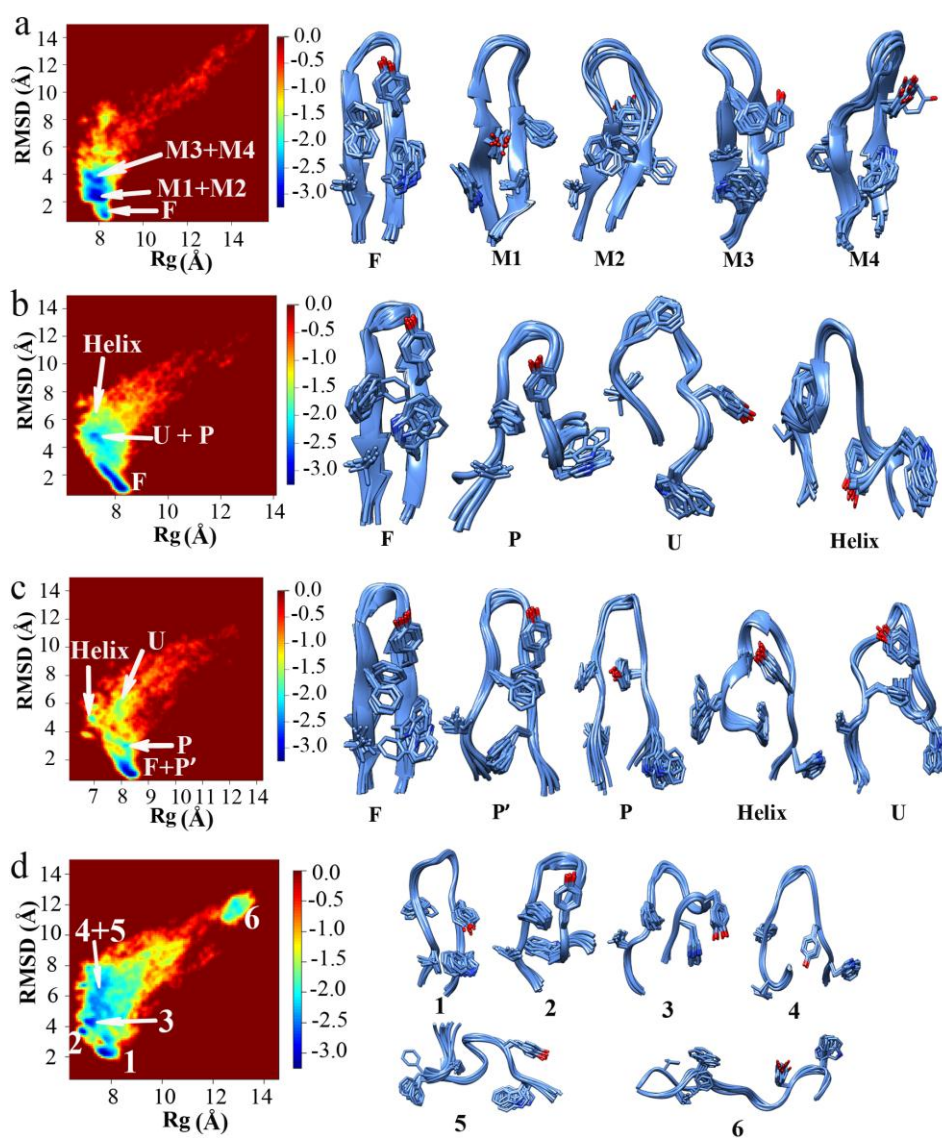

Figure S8. Two-dimensional free energy landscapes as the function of the backbone RMSD and Rg for the folding of GB1p in (a) water under FF96 force field, (b-d) water, MeOH/water, and EMIM-Cl/water under FF99SB-ILDN force field. The representative conformations for all distinct states are shown at right panel.

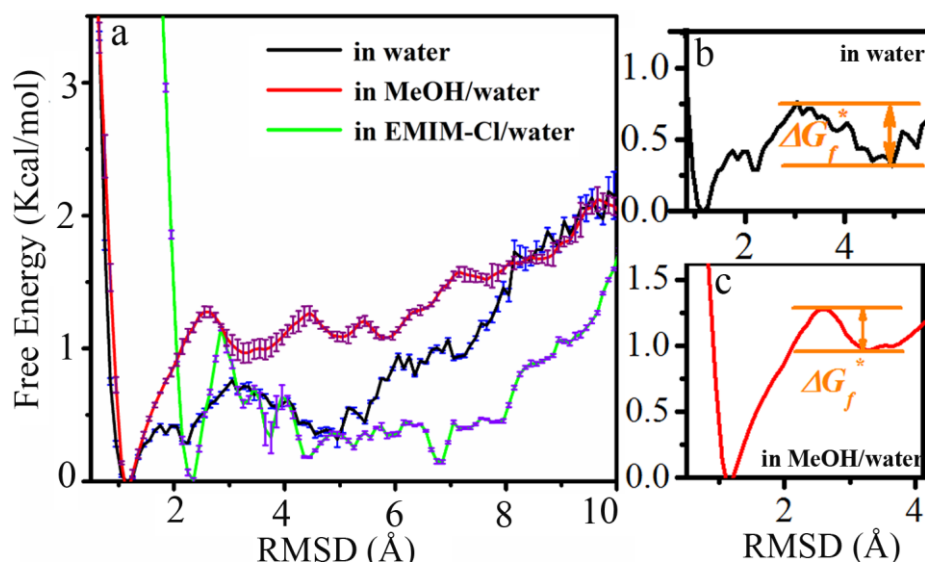

Figure S9. (a) One-dimensional free energy profiles as the function of the backbone RMSD for GB1p in water, MeOH/water, and EMIM-Cl/water solutions as simulated by FF99SB-ILDB force field, respectively. (b-c) Expanded view of the free energy profiles indicating the folding free energy barrier for GB1p in water and MeOH/water, respectively (the expanded view for GB1p in EMIM-Cl/water is not presented because of the unsuccessfully folding in the corresponding solution).

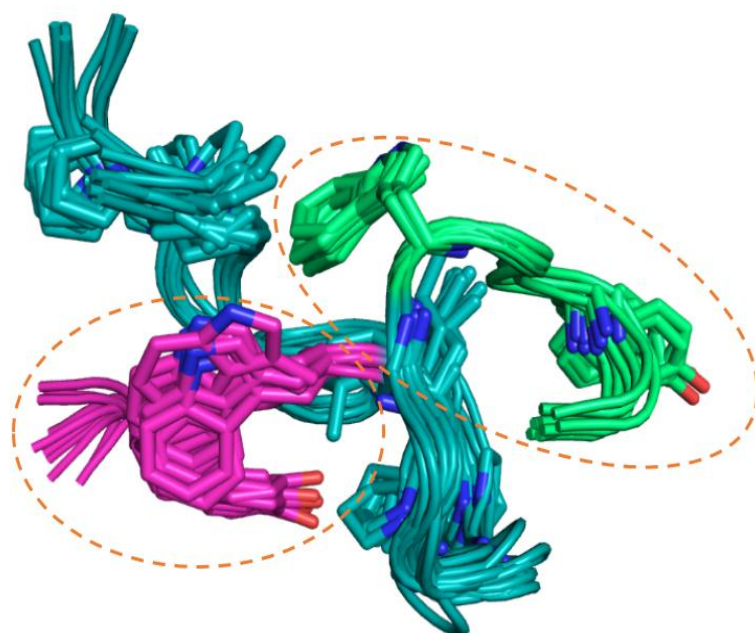

Figure S10. Comparison of the representative conformations of the unfolded states of Trp-cage in MeOH/water solution (green) and water (pink). Major difference at N-terminus is highlighted with yellow circles.
